# Supplementary material
Source: MDPI journal article supplement (https://www.mdpi.com/2073-4344/12/2/139)

## Supplementary Information

**Figure S1** Identification of *TaAA9A* using LC-MS/MS. The *TaAA9A* band was cut from the SDS-PAGE gel, extracted, and digested with trypsin. The extracted-ion chromatograms (EIC) (a) and Mascot search results (b) of the digested *TaAA9A* peptides are shown. The molecular ions of  $m/z$  456.74, 739.40, 739.91, 1744.80, 1313.60, 933.46, 1526.25, and 1528.75 were confirmed by MS/MS fragmentation analysis. Fragmentation  $m/z$  values agree with the molecular weight of the corresponding fragmentations of the digested *TaAA9A* peptides. The observed and calculated molecular mass of the normal and modified *TaAA9A* peptides were shown in Mascot search results.

**a**

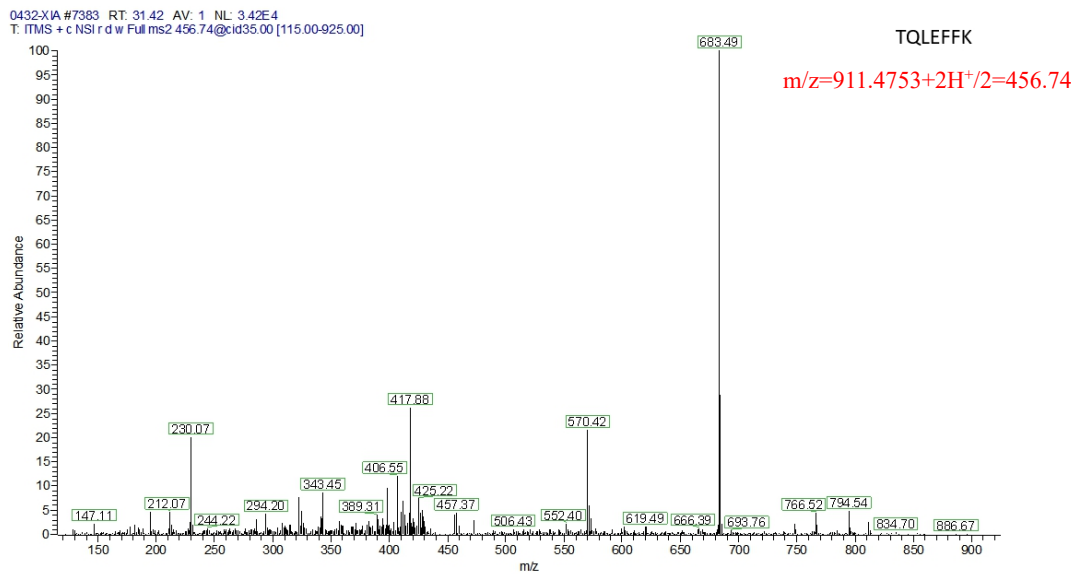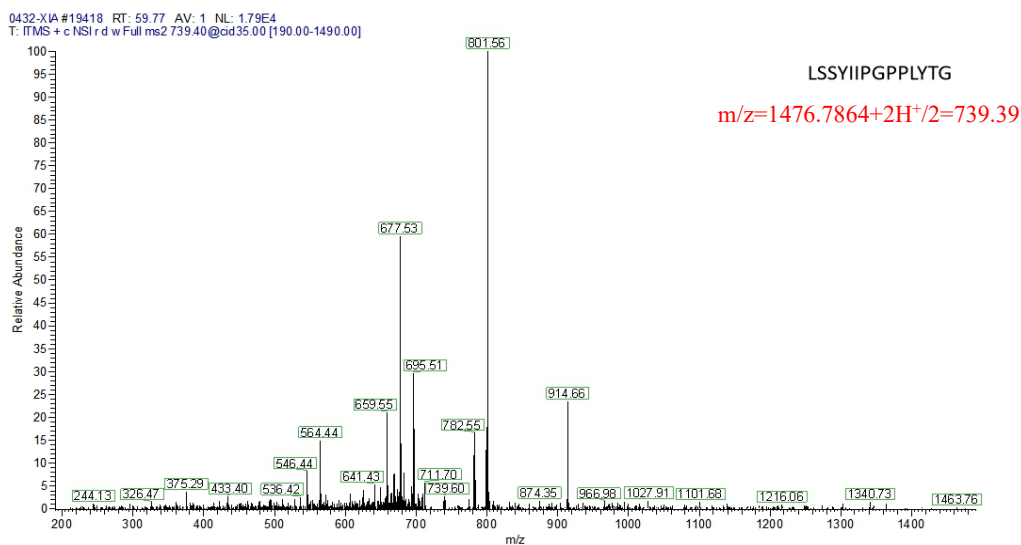

0432-XIA #18372 RT: 57.51 AV: 1 NL: 1.10E4  
T: ITMS + c NSI r d w Full ms2 739.91@cid35.00 [190.00-1490.00]

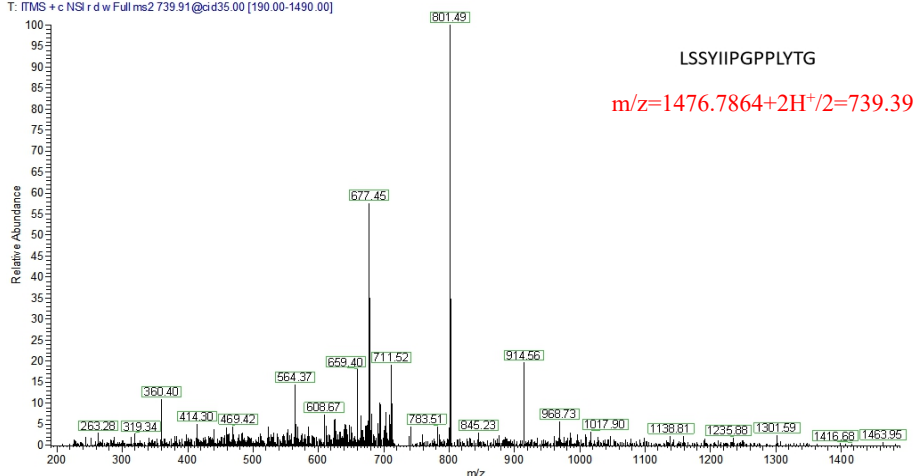

0432-XIA #18703 RT: 58.23 AV: 1 NL: 1.34E3  
T: ITMS + c NSI r d w Full ms2 1744.80@cid35.00 [470.00-2000.00]

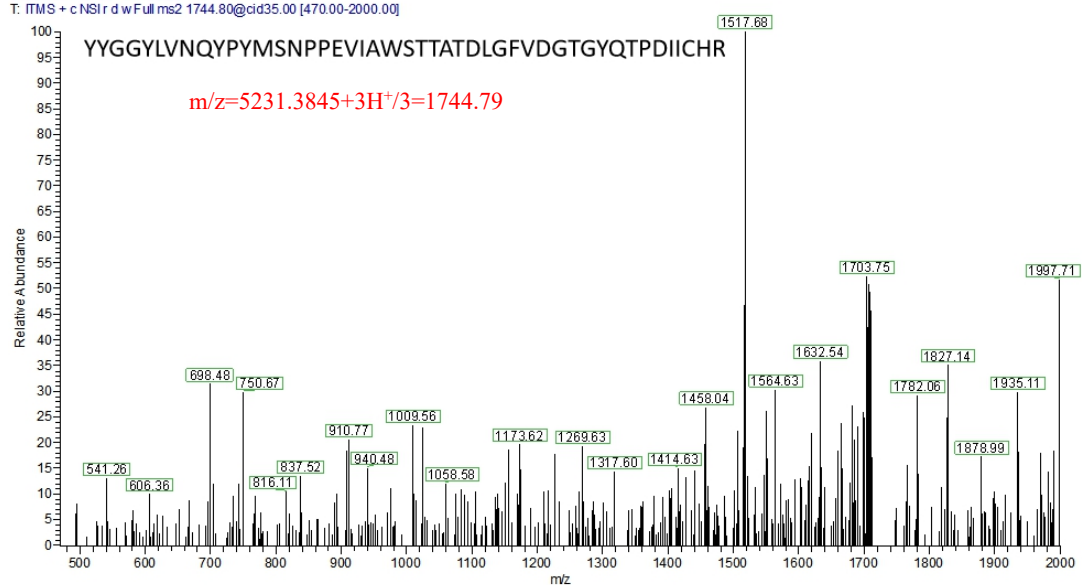

0432-XIA #19311 RT: 59.53 AV: 1 NL: 1.03E3  
T: ITMS + c NSI r d w Full ms2 1313.60@cid35.00 [350.00-2000.00]

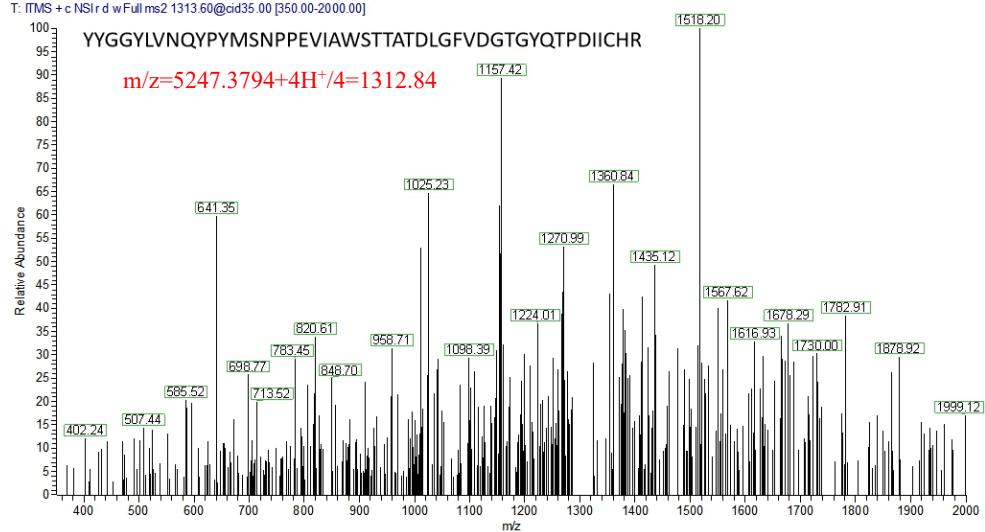

0432-XIA #17695 RT: 56.09 AV: 1 NL: 1.57E4  
T: ITMS + c NSI r d w Full ms2 933.46@cid35.00 [245.00-2000.00] TQLEFFKIAESGLINDDNPPGIWASDNLIAANNSWTVTIPTTIAPGNYVLR

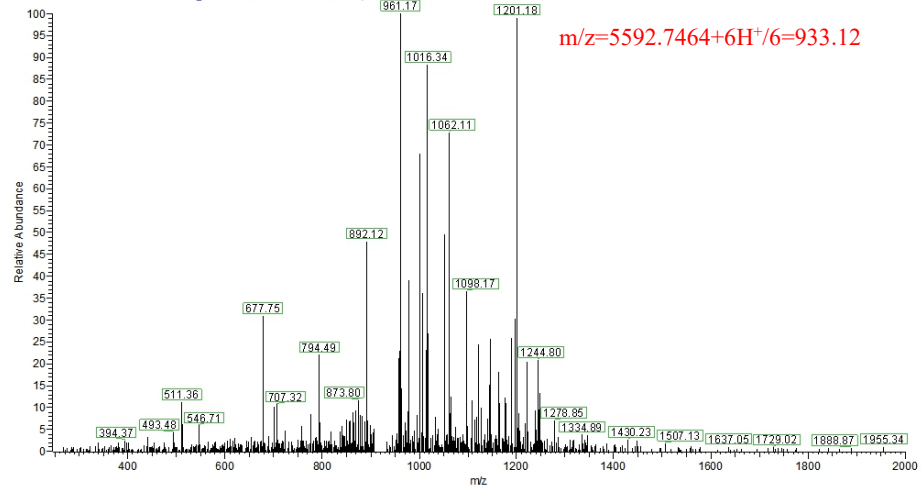

0432-XIA #17568 RT: 55.82 AV: 1 NL: 1.29E3  
T: ITMS + c NSI r d w Full ms2 1526.25@cid35.00 [410.00-2000.00]

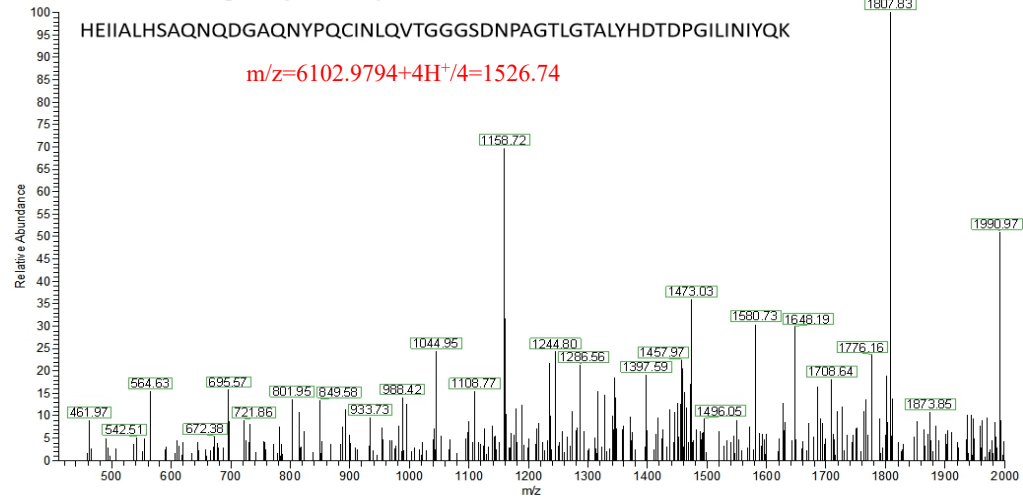

0432-XIA #18002 RT: 56.73 AV: 1 NL: 2.69E3  
T: ITMS + c NSI r d w Full ms2 1528.75@cid35.00 [410.00-2000.00] HEIIALHSAQNQDGAQNPQCINLQVTGGGSDNPAGTLGTALYHDTDPGILINIYQK

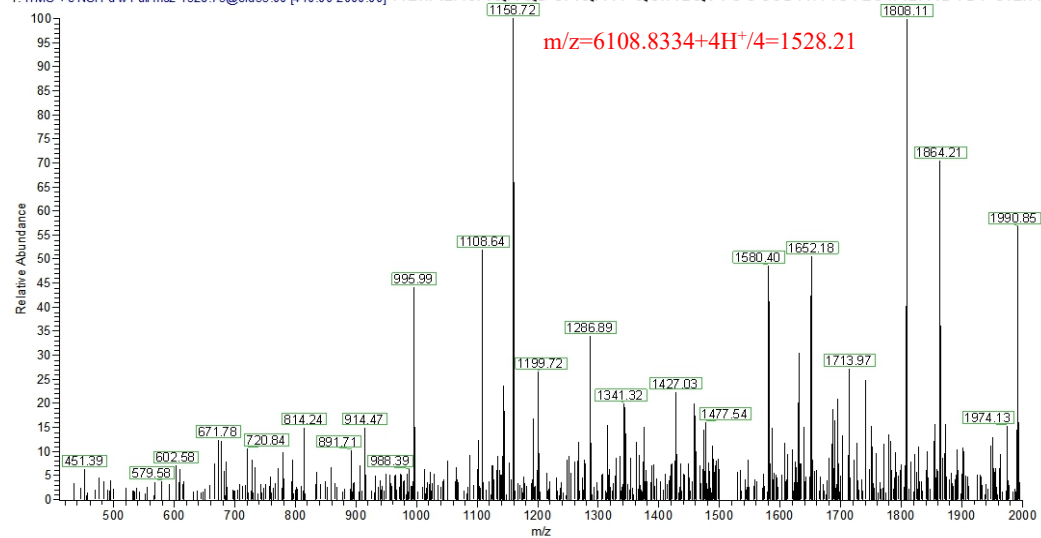

# b

## (MATRIX) SCIENCE Mascot Search Results

### Protein View

Match to: [gi|724666400|db|D138049.1](#) Score: 354  
KR 102014000101-A/1: Fusion proteins of CB61 with enhanced secretory capability comparing to its wild-type  
Found in search of: C:\Users\RELI\Desktop\LCMS\17\_20432-ALA.agf  
Translated in frame 1

MS Matches were also found in other frames indicating a possible frame shift.  
Only matches in frame 1 are shown in this report

Show frame 1

Nominal mass (M): 26756. Calculated pI value: 4.83

NCBI BLAST search of [gi|724666400|db|D138049.1](#) against nr  
Unformatted [sequence\\_string](#) for pasting into other applications

Fixed modification: Carbamidomethyl (C)

Variable modification: Acetyl (P), Protein N-term, Deamidated (NQ), Dioxidation (W), Oxidation (O)

Cleavage by Trypsin: cuts C-term side of KR unless next residue is P

Sequence Coverage: 67%

Matched peptides shown in Bold Red

1 RSRPIIATA GLASGLVA GCPNPQIVT DKXTTGGTL VNSPTNSHP  
61 PEVIAIRATIA TRLSPVHC TSPYTHICH GSPGLTAP YTGQ4753  
101 VTFPSPSBE PVMYLAPCH GCGTDTAT LRPPIAERG LINDSDPPCI  
161 KASDILASB RSTYTIPTT TAPYVPLRI RIALRDSAG QGASDPTCC  
201 LRAFTGSGG DNPACTGCTA LTVDTGCH LITUALSGT LTPGPTLTC  
261 \_

Show predicted peptides also

Sort Peptides By: \* Residue Number \* Increasing Mass \* Decreasing Mass

| Start | End  | Observed  | Mr (expt) | Mr (calc) | ppm | Miss | Sequence                                                   |                                                   |
|-------|------|-----------|-----------|-----------|-----|------|------------------------------------------------------------|---------------------------------------------------|
| 35    | -80  | 1744.1329 | 5229.3770 | 5229.4165 | -8  | 0    | K.YTGGILNQVFPMNSPPEVIAMSTTATDLGPDVGDTGTQTPDIICHR.G         | (Ions_score_0)                                    |
| 35    | -80  | 1744.1522 | 5229.4348 | 5229.4165 | 4   | 0    | K.YTGGILNQVFPMNSPPEVIAMSTTATDLGPDVGDTGTQTPDIICHR.G         | (Ions_score_3)                                    |
| 35    | -80  | 1744.4689 | 5230.3848 | 5230.4005 | -3  | 0    | K.YTGGILNQVFPMNSPPEVIAMSTTATDLGPDVGDTGTQTPDIICHR.G         | Deamidated (NQ) (Ions_score_24)                   |
| 35    | -80  | 1744.4749 | 5230.4027 | 5230.4005 | 0   | 0    | K.YTGGILNQVFPMNSPPEVIAMSTTATDLGPDVGDTGTQTPDIICHR.G         | Deamidated (NQ) (Ions_score_3)                    |
| 35    | -80  | 1744.7961 | 5231.3666 | 5231.3845 | -3  | 0    | K.YTGGILNQVFPMNSPPEVIAMSTTATDLGPDVGDTGTQTPDIICHR.G         | 2 Deamidated (NQ) (Ions_score_3)                  |
| 35    | -80  | 1744.7968 | 5231.3684 | 5231.3845 | -3  | 0    | K.YTGGILNQVFPMNSPPEVIAMSTTATDLGPDVGDTGTQTPDIICHR.G         | 2 Deamidated (NQ) (Ions_score_11)                 |
| 35    | -80  | 1745.1301 | 5232.3686 | 5232.3685 | 0   | 0    | K.YTGGILNQVFPMNSPPEVIAMSTTATDLGPDVGDTGTQTPDIICHR.G         | 3 Deamidated (NQ) (Ions_score_15)                 |
| 35    | -80  | 1312.3594 | 5245.4084 | 5245.4114 | -1  | 0    | K.YTGGILNQVFPMNSPPEVIAMSTTATDLGPDVGDTGTQTPDIICHR.G         | Oxidation (M) (Ions_score_2)                      |
| 35    | -80  | 1312.6049 | 5246.3903 | 5246.3954 | -1  | 0    | K.YTGGILNQVFPMNSPPEVIAMSTTATDLGPDVGDTGTQTPDIICHR.G         | Deamidated (NQ); Oxidation (M) (Ions_score_11)    |
| 35    | -80  | 1312.6092 | 5246.4035 | 5246.3954 | 2   | 0    | K.YTGGILNQVFPMNSPPEVIAMSTTATDLGPDVGDTGTQTPDIICHR.G         | Deamidated (NQ); Oxidation (M) (Ions_score_4)     |
| 35    | -80  | 1312.8511 | 5247.3752 | 5247.3794 | -1  | 0    | K.YTGGILNQVFPMNSPPEVIAMSTTATDLGPDVGDTGTQTPDIICHR.G         | 2 Deamidated (NQ); Oxidation (M) (Ions_score_4)   |
| 129   | -135 | 456.7441  | 911.4737  | 911.4753  | -2  | 0    | K.TQLEFFK.I                                                | (Ions_score_27)                                   |
| 129   | -135 | 456.7453  | 911.4761  | 911.4753  | 1   | 0    | K.TQLEFFK.I                                                | (Ions_score_25)                                   |
| 129   | -135 | 456.7457  | 911.4768  | 911.4753  | 2   | 0    | K.TQLEFFK.I                                                | (Ions_score_19)                                   |
| 129   | -135 | 456.7458  | 911.4770  | 911.4753  | 2   | 0    | K.TQLEFFK.I                                                | (Ions_score_19)                                   |
| 129   | -135 | 456.7458  | 911.4770  | 911.4753  | 2   | 0    | K.TQLEFFK.I                                                | (Ions_score_22)                                   |
| 129   | -135 | 456.7458  | 911.4770  | 911.4753  | 2   | 0    | K.TQLEFFK.I                                                | (Ions_score_22)                                   |
| 129   | -135 | 456.7458  | 911.4770  | 911.4753  | 2   | 0    | K.TQLEFFK.I                                                | (Ions_score_24)                                   |
| 129   | -135 | 456.7459  | 911.4771  | 911.4753  | 2   | 0    | K.TQLEFFK.I                                                | (Ions_score_28)                                   |
| 129   | -135 | 456.7459  | 911.4772  | 911.4753  | 2   | 0    | K.TQLEFFK.I                                                | (Ions_score_29)                                   |
| 129   | -135 | 456.7459  | 911.4772  | 911.4753  | 2   | 0    | K.TQLEFFK.I                                                | (Ions_score_22)                                   |
| 129   | -135 | 456.7459  | 911.4772  | 911.4753  | 2   | 0    | K.TQLEFFK.I                                                | (Ions_score_25)                                   |
| 129   | -135 | 456.7459  | 911.4773  | 911.4753  | 2   | 0    | K.TQLEFFK.I                                                | (Ions_score_25)                                   |
| 129   | -135 | 456.7459  | 911.4773  | 911.4753  | 2   | 0    | K.TQLEFFK.I                                                | (Ions_score_25)                                   |
| 129   | -135 | 456.7460  | 911.4775  | 911.4753  | 2   | 0    | K.TQLEFFK.I                                                | (Ions_score_19)                                   |
| 129   | -135 | 456.7460  | 911.4775  | 911.4753  | 2   | 0    | K.TQLEFFK.I                                                | (Ions_score_21)                                   |
| 129   | -135 | 456.7460  | 911.4775  | 911.4753  | 2   | 0    | K.TQLEFFK.I                                                | (Ions_score_21)                                   |
| 129   | -135 | 456.7461  | 911.4776  | 911.4753  | 3   | 0    | K.TQLEFFK.I                                                | (Ions_score_21)                                   |
| 129   | -135 | 456.7461  | 911.4777  | 911.4753  | 3   | 0    | K.TQLEFFK.I                                                | (Ions_score_18)                                   |
| 129   | -135 | 456.7461  | 911.4777  | 911.4753  | 3   | 0    | K.TQLEFFK.I                                                | (Ions_score_19)                                   |
| 129   | -135 | 456.7461  | 911.4777  | 911.4753  | 3   | 0    | K.TQLEFFK.I                                                | (Ions_score_19)                                   |
| 129   | -135 | 456.7461  | 911.4777  | 911.4753  | 3   | 0    | K.TQLEFFK.I                                                | (Ions_score_22)                                   |
| 129   | -135 | 456.7462  | 911.4779  | 911.4753  | 3   | 0    | K.TQLEFFK.I                                                | (Ions_score_17)                                   |
| 129   | -135 | 456.7462  | 911.4779  | 911.4753  | 3   | 0    | K.TQLEFFK.I                                                | (Ions_score_24)                                   |
| 129   | -135 | 456.7462  | 911.4779  | 911.4753  | 3   | 0    | K.TQLEFFK.I                                                | (Ions_score_24)                                   |
| 129   | -135 | 456.7462  | 911.4779  | 911.4753  | 3   | 0    | K.TQLEFFK.I                                                | (Ions_score_24)                                   |
| 129   | -135 | 456.7462  | 911.4779  | 911.4753  | 3   | 0    | K.TQLEFFK.I                                                | (Ions_score_21)                                   |
| 129   | -135 | 456.7462  | 911.4779  | 911.4753  | 3   | 0    | K.TQLEFFK.I                                                | (Ions_score_21)                                   |
| 129   | -135 | 456.7463  | 911.4780  | 911.4753  | 3   | 0    | K.TQLEFFK.I                                                | (Ions_score_21)                                   |
| 129   | -135 | 456.7463  | 911.4781  | 911.4753  | 3   | 0    | K.TQLEFFK.I                                                | (Ions_score_23)                                   |
| 129   | -135 | 456.7463  | 911.4781  | 911.4753  | 3   | 0    | K.TQLEFFK.I                                                | (Ions_score_23)                                   |
| 129   | -135 | 456.7464  | 911.4782  | 911.4753  | 3   | 0    | K.TQLEFFK.I                                                | (Ions_score_18)                                   |
| 129   | -135 | 456.7464  | 911.4782  | 911.4753  | 3   | 0    | K.TQLEFFK.I                                                | (Ions_score_22)                                   |
| 129   | -135 | 456.7464  | 911.4782  | 911.4753  | 3   | 0    | K.TQLEFFK.I                                                | (Ions_score_19)                                   |
| 129   | -135 | 456.7464  | 911.4782  | 911.4753  | 3   | 0    | K.TQLEFFK.I                                                | (Ions_score_17)                                   |
| 129   | -135 | 456.7464  | 911.4782  | 911.4753  | 3   | 0    | K.TQLEFFK.I                                                | (Ions_score_19)                                   |
| 129   | -135 | 456.7464  | 911.4782  | 911.4753  | 3   | 0    | K.TQLEFFK.I                                                | (Ions_score_19)                                   |
| 129   | -135 | 456.7464  | 911.4782  | 911.4753  | 3   | 0    | K.TQLEFFK.I                                                | (Ions_score_23)                                   |
| 129   | -135 | 456.7465  | 911.4784  | 911.4753  | 3   | 0    | K.TQLEFFK.I                                                | (Ions_score_23)                                   |
| 129   | -135 | 456.7465  | 911.4784  | 911.4753  | 3   | 0    | K.TQLEFFK.I                                                | (Ions_score_21)                                   |
| 129   | -135 | 456.7465  | 911.4785  | 911.4753  | 4   | 0    | K.TQLEFFK.I                                                | (Ions_score_23)                                   |
| 129   | -135 | 456.7466  | 911.4786  | 911.4753  | 4   | 0    | K.TQLEFFK.I                                                | (Ions_score_23)                                   |
| 129   | -135 | 456.7466  | 911.4786  | 911.4753  | 4   | 0    | K.TQLEFFK.I                                                | (Ions_score_21)                                   |
| 129   | -135 | 456.7466  | 911.4786  | 911.4753  | 4   | 0    | K.TQLEFFK.I                                                | (Ions_score_20)                                   |
| 129   | -135 | 456.7466  | 911.4787  | 911.4753  | 4   | 0    | K.TQLEFFK.I                                                | (Ions_score_22)                                   |
| 129   | -135 | 456.7467  | 911.4789  | 911.4753  | 4   | 0    | K.TQLEFFK.I                                                | (Ions_score_24)                                   |
| 129   | -135 | 456.7467  | 911.4789  | 911.4753  | 4   | 0    | K.TQLEFFK.I                                                | (Ions_score_28)                                   |
| 129   | -135 | 456.7468  | 911.4790  | 911.4753  | 4   | 0    | K.TQLEFFK.I                                                | (Ions_score_17)                                   |
| 129   | -135 | 456.7469  | 911.4792  | 911.4753  | 4   | 0    | K.TQLEFFK.I                                                | (Ions_score_22)                                   |
| 129   | -135 | 456.7470  | 911.4795  | 911.4753  | 5   | 0    | K.TQLEFFK.I                                                | (Ions_score_23)                                   |
| 129   | -135 | 456.7472  | 911.4798  | 911.4753  | 5   | 0    | K.TQLEFFK.I                                                | (Ions_score_18)                                   |
| 129   | -135 | 456.7473  | 911.4800  | 911.4753  | 5   | 0    | K.TQLEFFK.I                                                | (Ions_score_19)                                   |
| 129   | -135 | 456.7474  | 911.4802  | 911.4753  | 5   | 0    | K.TQLEFFK.I                                                | (Ions_score_22)                                   |
| 129   | -135 | 456.7487  | 911.4828  | 911.4753  | 8   | 0    | K.TQLEFFK.I                                                | (Ions_score_14)                                   |
| 129   | -135 | 457.2375  | 912.4605  | 912.4593  | 1   | 0    | K.TQLEFFK.I                                                | Deamidated (NQ) (Ions_score_15)                   |
| 129   | -179 | 933.1226  | 5592.6917 | 5592.7464 | -10 | 1    | K.TQLEFFKIASGLINDNPQINWASNDLIANNNSVTIPTIAPQNTVLR.H         | 4 Deamidated (NQ); Dioxidation (W) (Ions_score_2) |
| 180   | -236 | 1526.2469 | 6100.9587 | 6100.9413 | -0  | 0    | R.HEIALHSAQNDQAGNYPCQINLQVTGGSDNPACTLGTALYHDTDPGILINITYQ.L | (Ions_score_13)                                   |
| 180   | -236 | 1221.3927 | 6101.9271 | 6101.9454 | -3  | 0    | R.HEIALHSAQNDQAGNYPCQINLQVTGGSDNPACTLGTALYHDTDPGILINITYQ.L | Deamidated (NQ) (Ions_score_1)                    |
| 180   | -236 | 1526.4905 | 6101.9328 | 6101.9454 | -2  | 0    | R.HEIALHSAQNDQAGNYPCQINLQVTGGSDNPACTLGTALYHDTDPGILINITYQ.L | Deamidated (NQ) (Ions_score_34)                   |
| 180   | -236 | 1526.4971 | 6101.9592 | 6101.9454 | 2   | 0    | R.HEIALHSAQNDQAGNYPCQINLQVTGGSDNPACTLGTALYHDTDPGILINITYQ.L | Deamidated (NQ) (Ions_score_17)                   |
| 180   | -236 | 1526.7472 | 6102.9597 | 6102.9294 | 5   | 0    | R.HEIALHSAQNDQAGNYPCQINLQVTGGSDNPACTLGTALYHDTDPGILINITYQ.L | 2 Deamidated (NQ) (Ions_score_17)                 |
| 180   | -236 | 1221.6031 | 6102.9794 | 6102.9294 | 8   | 0    | R.HEIALHSAQNDQAGNYPCQINLQVTGGSDNPACTLGTALYHDTDPGILINITYQ.L | 2 Deamidated (NQ) (Ions_score_7)                  |
| 180   | -236 | 1222.5762 | 6107.8445 | 6107.8494 | -1  | 0    | R.HEIALHSAQNDQAGNYPCQINLQVTGGSDNPACTLGTALYHDTDPGILINITYQ.L | 7 Deamidated (NQ) (Ions_score_3)                  |
| 180   | -236 | 1528.2256 | 6108.8732 | 6108.8334 | 7   | 0    | R.HEIALHSAQNDQAGNYPCQINLQVTGGSDNPACTLGTALYHDTDPGILINITYQ.L | 8 Deamidated (NQ) (Ions_score_23)                 |
| 237   | -250 | 739.4025  | 1476.7905 | 1476.7864 | 3   | 0    | K.LSSTIIPGPPLYTG.-                                         | (Ions_score_20)                                   |
| 237   | -250 | 739.4027  | 1476.7909 | 1476.7864 | 3   | 0    | K.LSSTIIPGPPLYTG.-                                         | (Ions_score_9)                                    |
| 237   | -250 | 739.4030  | 1476.7914 | 1476.7864 | 3   | 0    | K.LSSTIIPGPPLYTG.-                                         | (Ions_score_17)                                   |
| 237   | -250 | 739.4032  | 1476.7918 | 1476.7864 | 4   | 0    | K.LSSTIIPGPPLYTG.-                                         | (Ions_score_4)                                    |
| 237   | -250 | 739.4037  | 1476.7929 | 1476.7864 | 4   | 0    | K.LSSTIIPGPPLYTG.-                                         | (Ions_score_16)                                   |
| 237   | -250 | 739.4038  | 1476.7931 | 1476.7864 | 4   | 0    | K.LSSTIIPGPPLYTG.-                                         | (Ions_score_10)                                   |
| 237   | -250 | 739.4044  | 1476.7942 | 1476.7864 | 5   | 0    | K.LSSTIIPGPPLYTG.-                                         | (Ions_score_17)                                   |
| 237   | -250 | 739.4045  | 1476.7944 | 1476.7864 | 5   | 0    | K.LSSTIIPGPPLYTG.-                                         | (Ions_score_10)                                   |
| 237   | -250 | 739.4045  | 1476.7944 | 1476.7864 | 5   | 0    | K.LSSTIIPGPPLYTG.-                                         | (Ions_score_3)                                    |
| 237   | -250 | 739.4050  | 1476.7955 | 1476.7864 | 6   | 0    | K.LSSTIIPGPPLYTG.-                                         | (Ions_score_16)                                   |
| 237   | -250 | 739.4054  | 1476.7962 | 1476.7864 | 7   | 0    | K.LSSTIIPGPPLYTG.-                                         | (Ions_score_18)                                   |

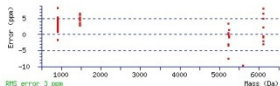

**Figure S2.** Structure of C1- and C4-oxidized and non-oxidized xylo-oligosaccharides

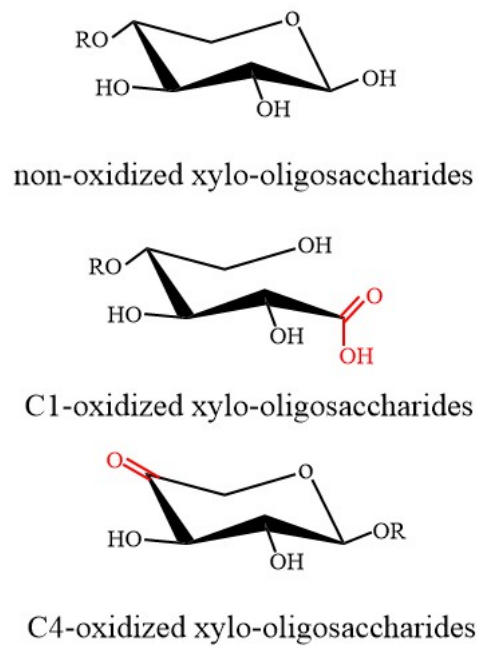

**Figure S3.** Structure-based sequence alignment of *nTaAA9A* and *CvAA9\_A*.

Structural superposition and figure creation were carried out with Chimera.

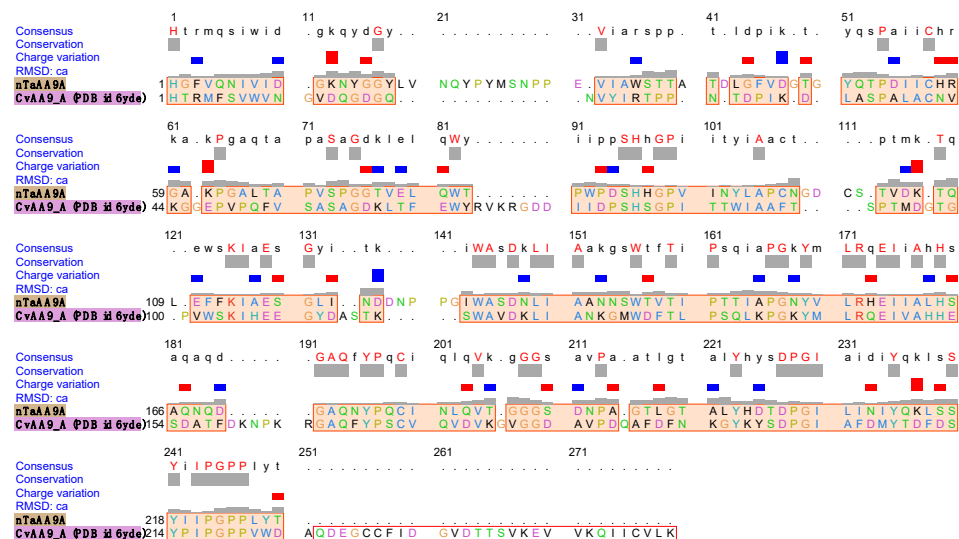

**Figure S4.** The cluster of the four residues used for the construction of a tetramutant in AfAA9\_B with enhanced thermostability. The four residues (Val90, Ser131, Leu134, and Trp141) are shown in sphere representation. The glycosylation site and the Cu-binding site are also depicted (in stick representation).

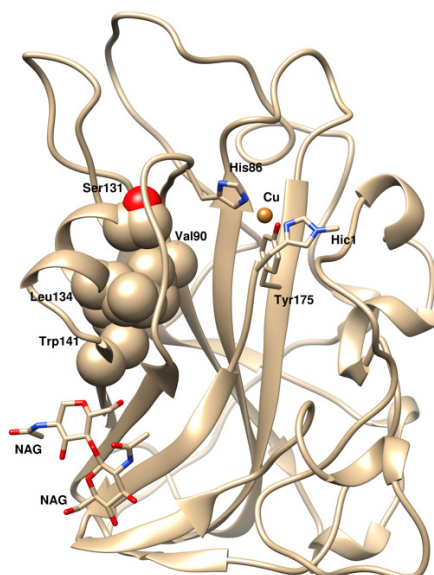

Supplement: s1 [file s1]
